# Supplementary material
Source: MDPI journal article supplement (https://www.mdpi.com/2073-4433/14/3/594)
Supplement: s1 [file s1]

## Supplementary Materials:

Annalisa Di Bernardino <sup>1,\*</sup>, Gabriele Mevi <sup>2</sup>, Anna Maria Iannarelli <sup>2</sup>, Serena Falasca <sup>1</sup>, Alexander Cede <sup>3</sup>, Martin Tiefengraber <sup>3</sup> and Stefano Casadio <sup>2,4</sup>

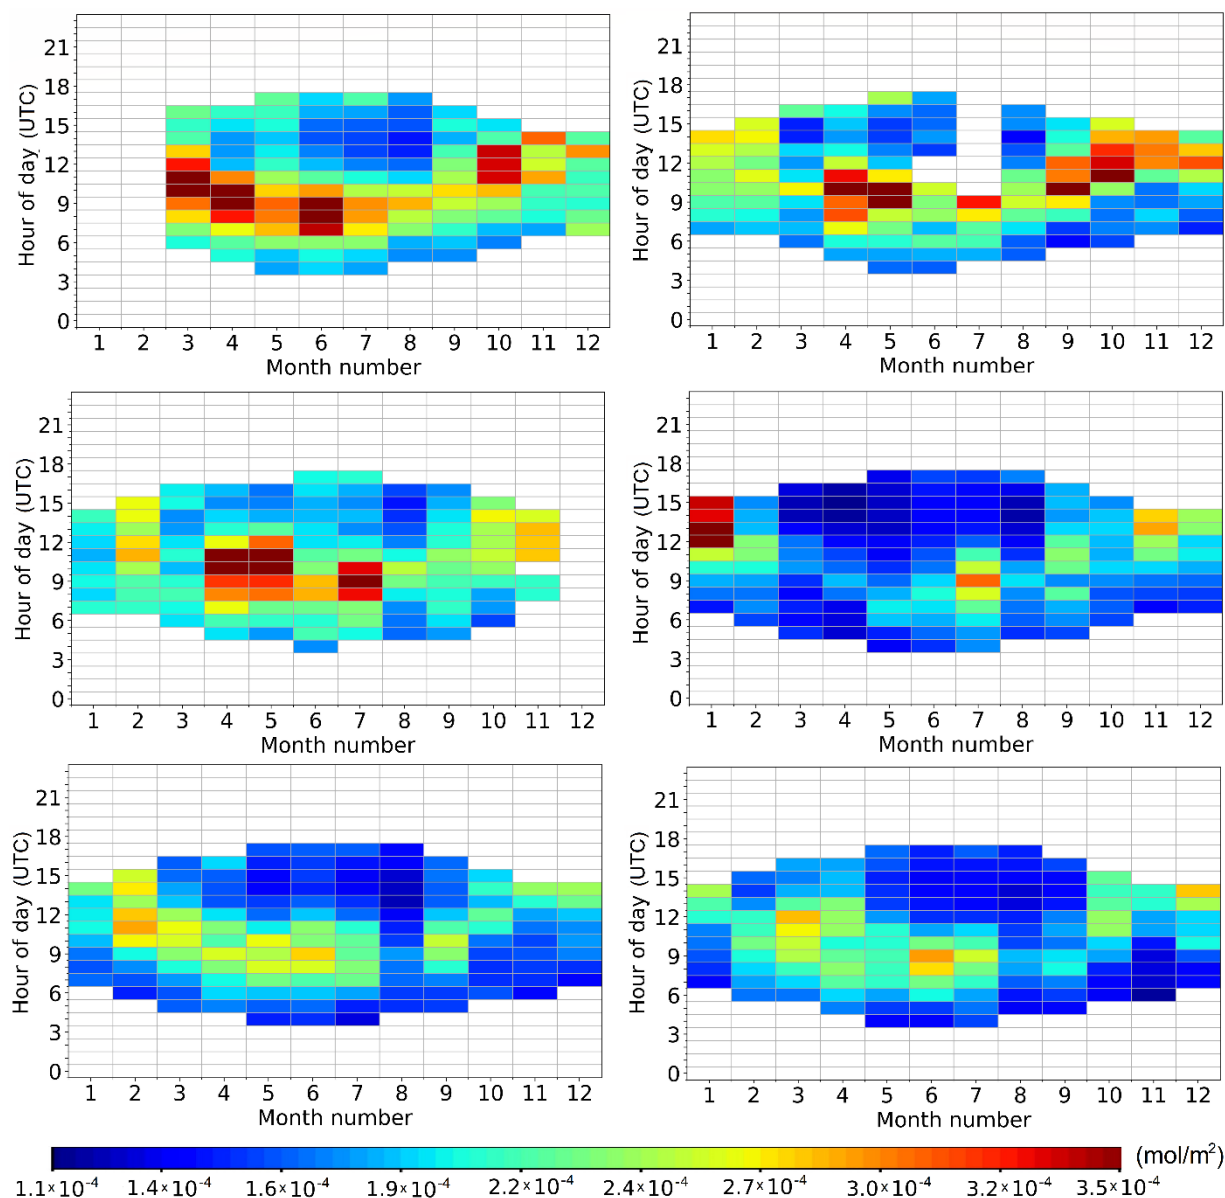

**Figure S1.** Hourly and monthly variation of VC-NO<sub>2</sub> for workdays during 2017 (upper left panel), 2018 (upper right panel), 2019 (central left panel), 2020 (central right panel), 2021 (lower left panel), and 2022 (lower right panel).

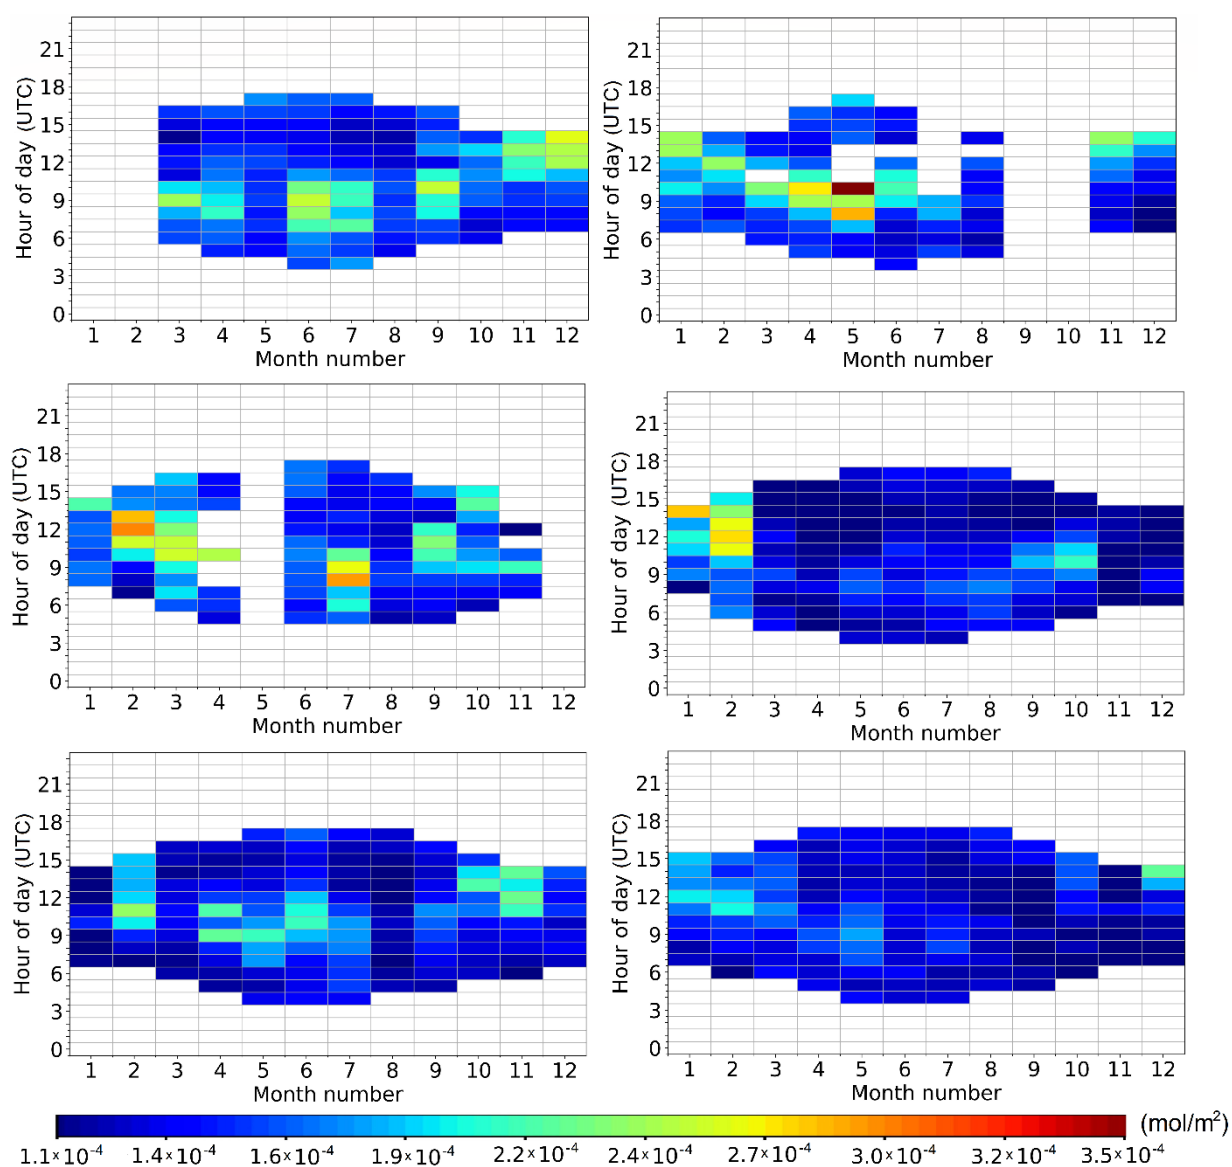

**Figure S2.** Hourly and monthly variation of VC-NO<sub>2</sub> for weekends during 2017 (upper left panel), 2018 (upper right panel), 2019 (central left panel), 2020 (central right panel), 2021 (lower left panel), and 2022 (lower right panel).

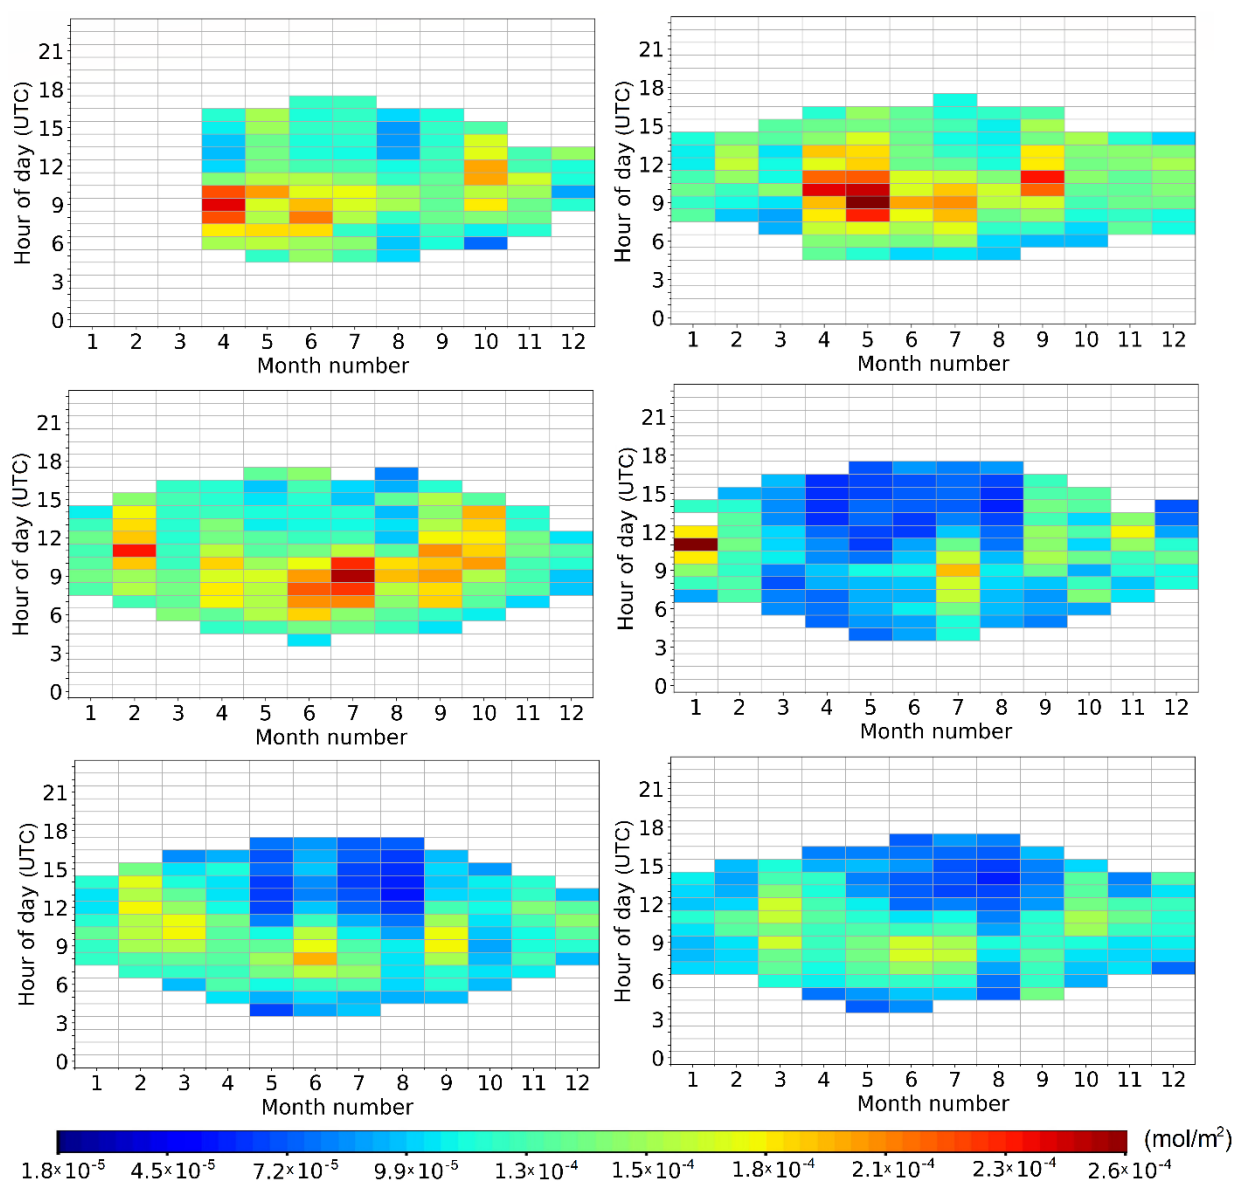

**Figure S3.** Hourly and monthly variation of TC-NO<sub>2</sub> for workdays during 2017 (upper left panel), 2018 (upper right panel), 2019 (central left panel), 2020 (central right panel), 2021 (lower left panel), and 2022 (lower right panel).

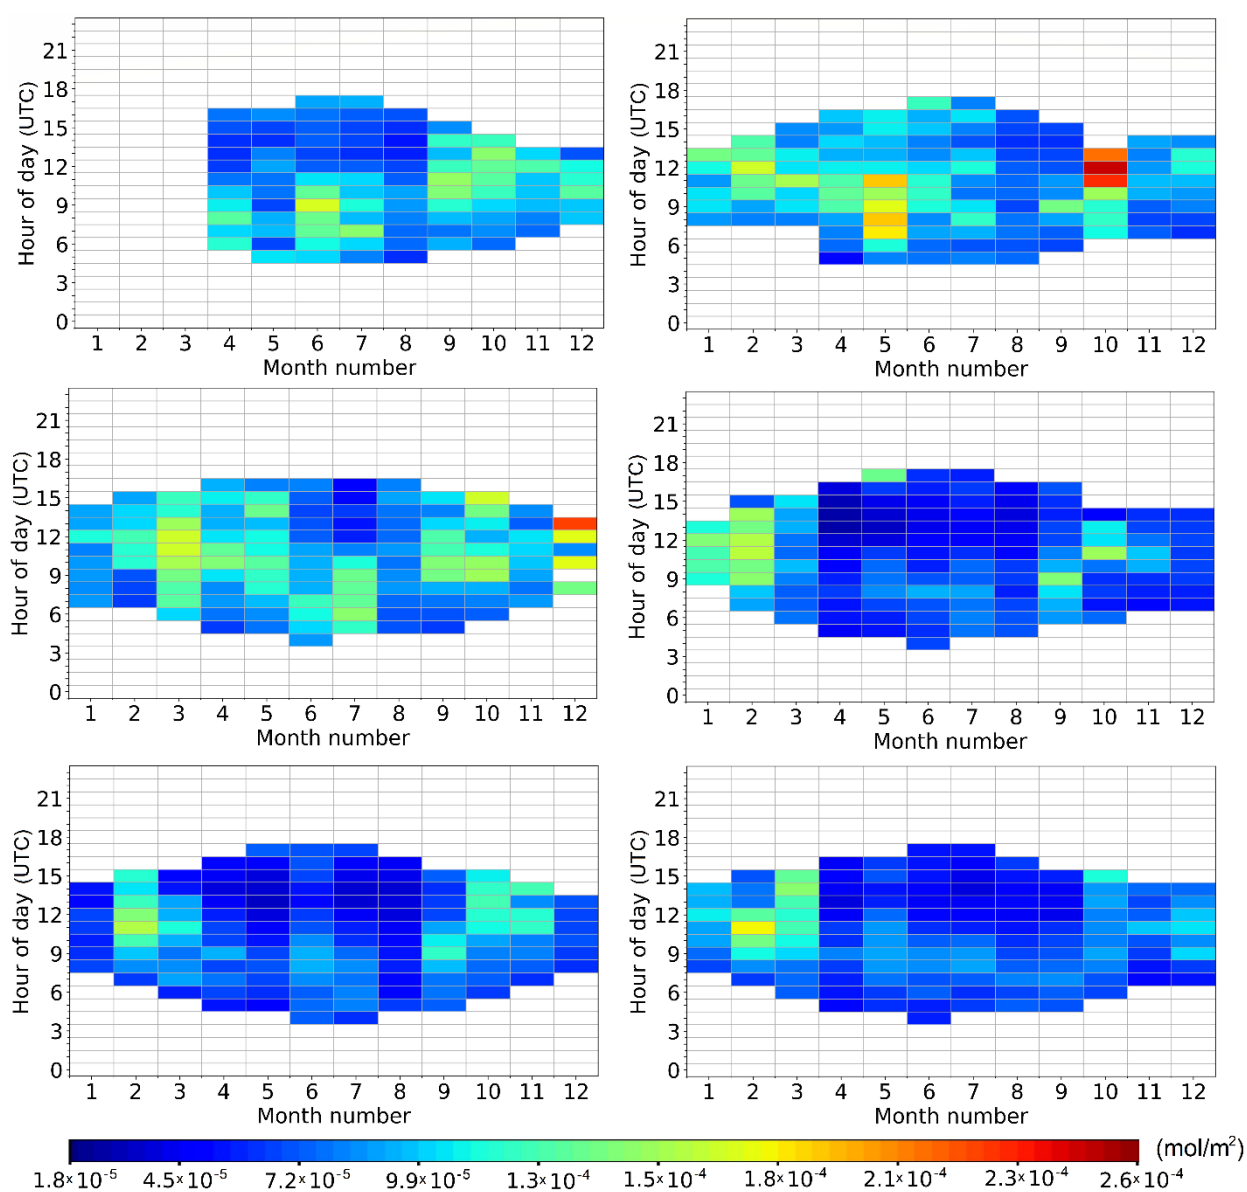

**Figure S4.** Hourly and monthly variation of TC-NO<sub>2</sub> for weekends during 2017 (upper left panel), 2018 (upper right panel), 2019 (central left panel), 2020 (central right panel), 2021 (lower left panel), and 2022 (lower right panel).

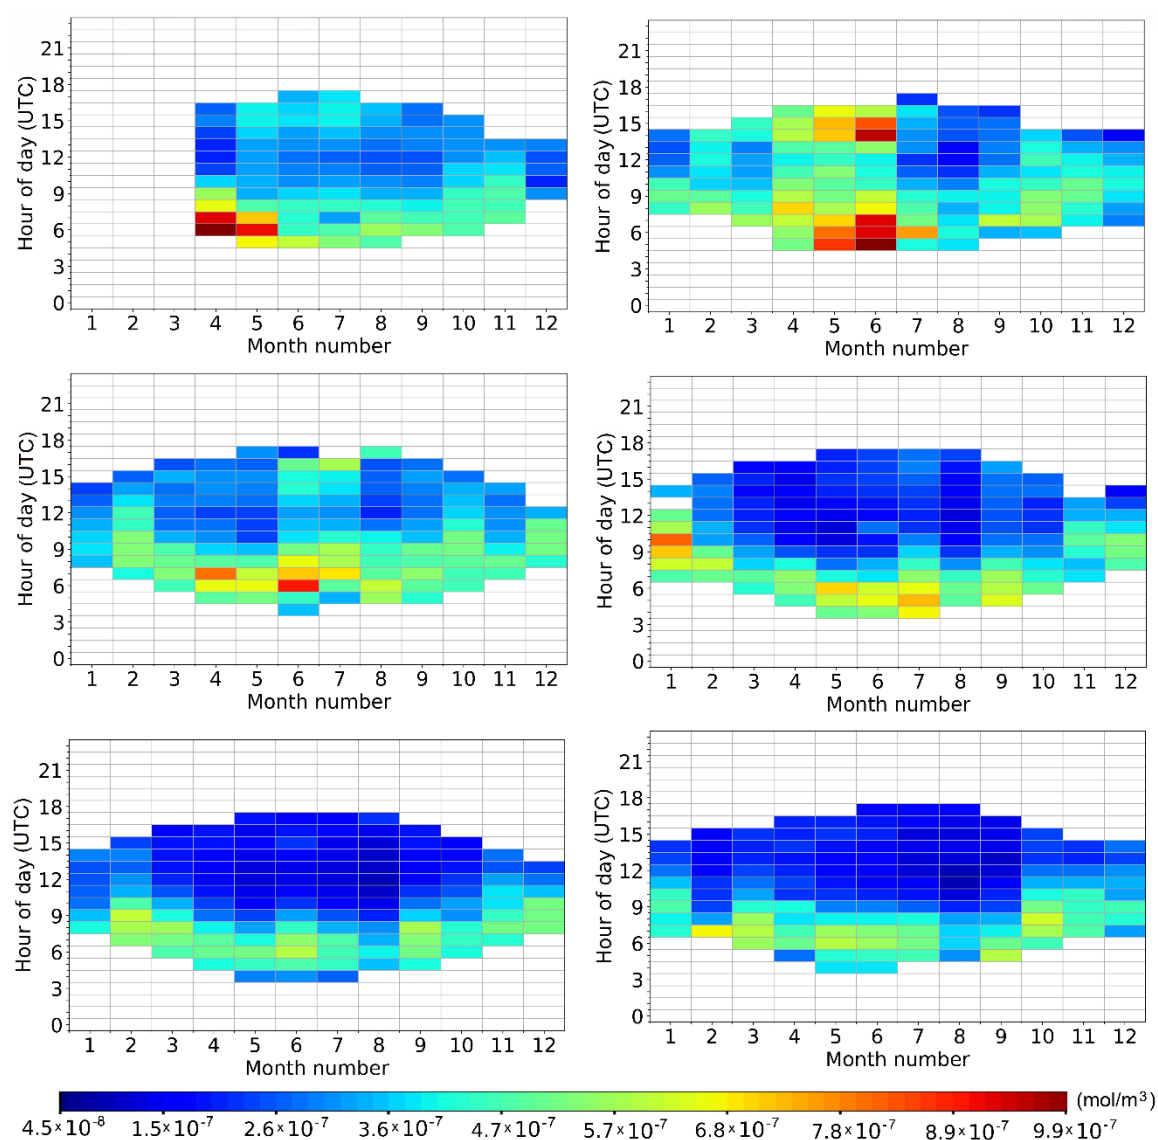

**Figure S5.** Hourly and monthly variation of SC-NO<sub>2</sub> for workdays during 2017 (upper left panel), 2018 (upper right panel), 2019 (central left panel), 2020 (central right panel), 2021 (lower left panel), and 2022 (lower right panel).

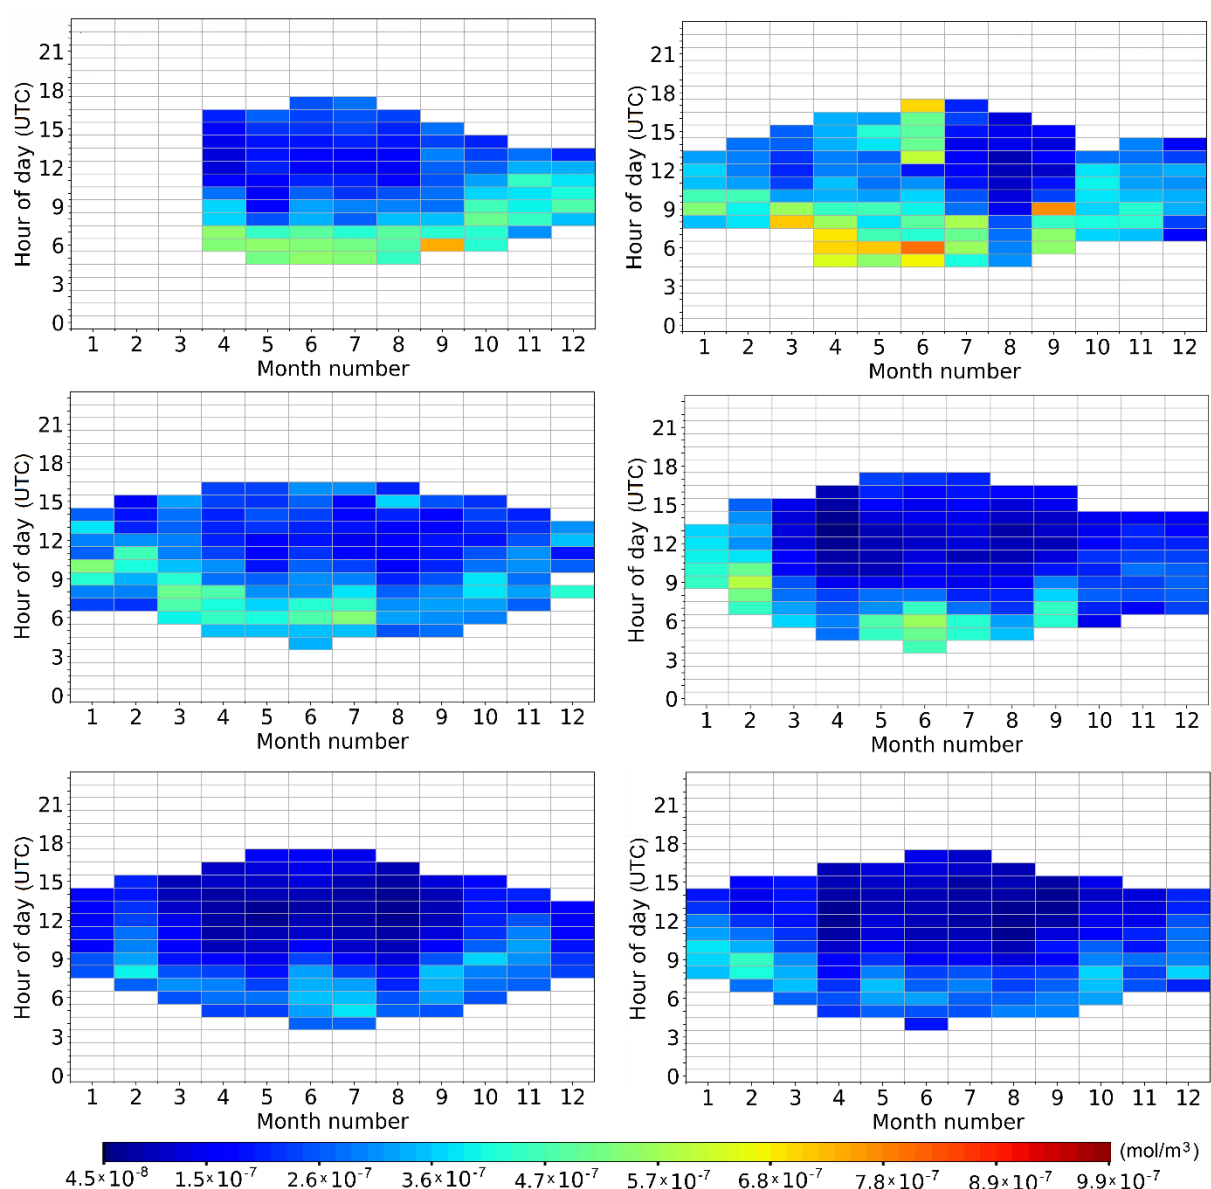

**Figure S6.** Hourly and monthly variation of SC-NO<sub>2</sub> for weekends during 2017 (upper left panel), 2018 (upper right panel), 2019 (central left panel), 2020 (central right panel), 2021 (lower left panel), and 2022 (lower right panel).

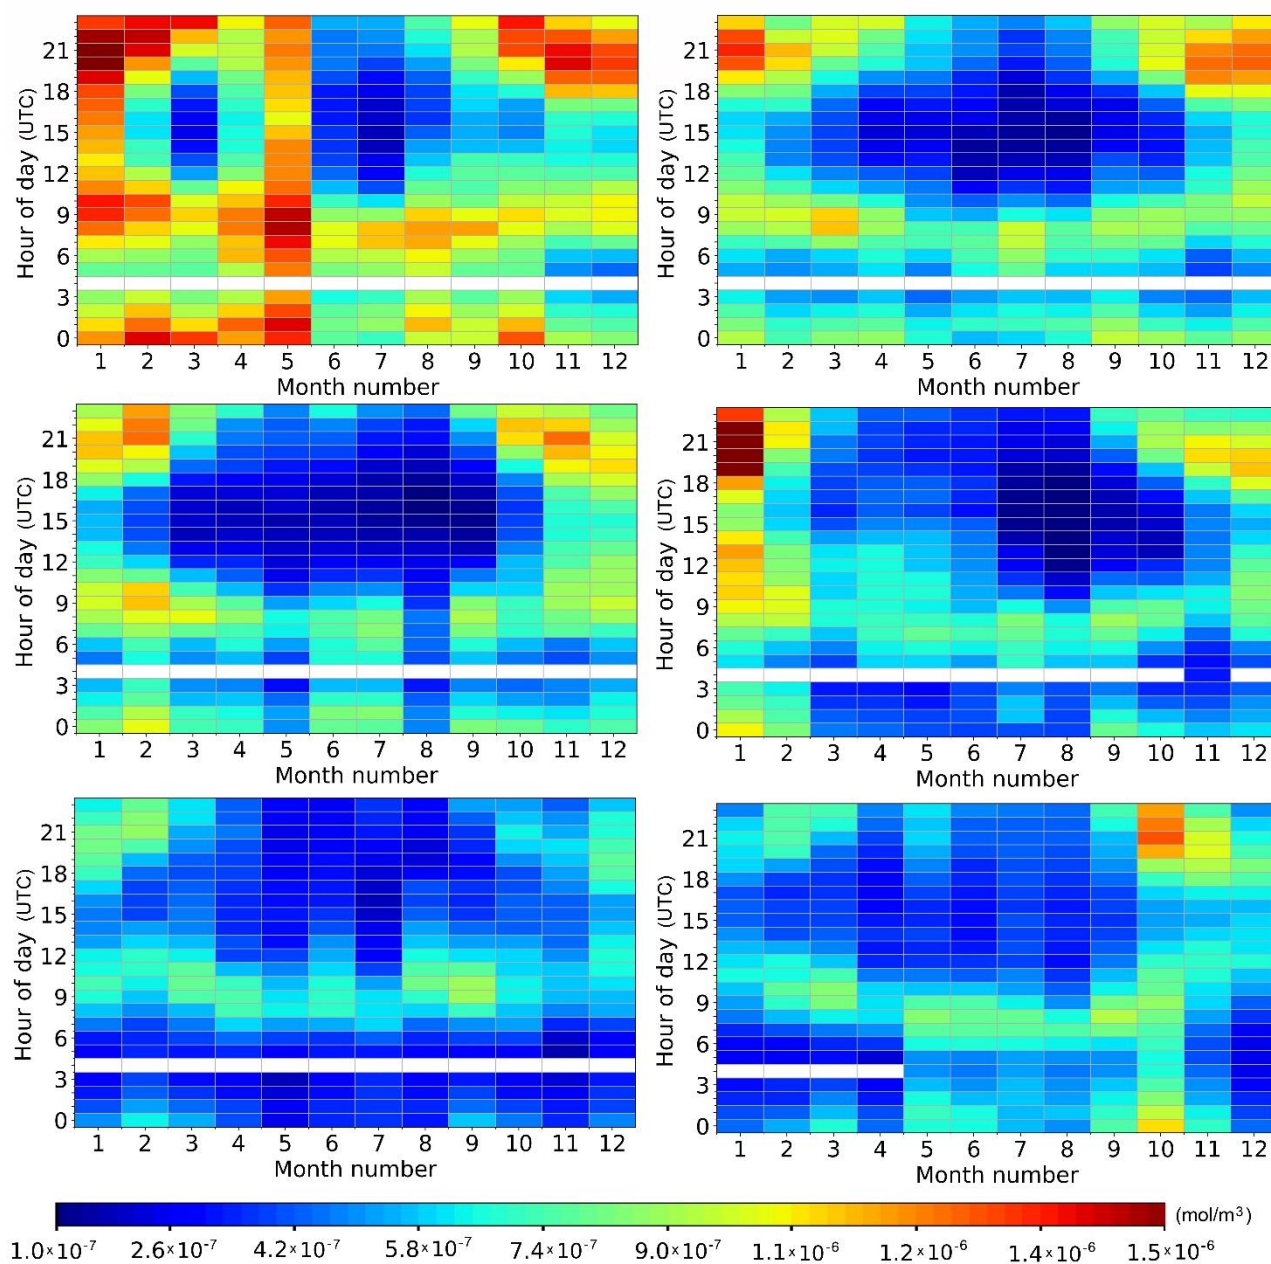

**Figure S7.** Hourly and monthly variation of in-situ  $\text{NO}_2$  for workdays during 2017 (upper left panel), 2018 (upper right panel), 2019 (central left panel), 2020 (central right panel), 2021 (lower left panel), and 2022 (lower right panel).



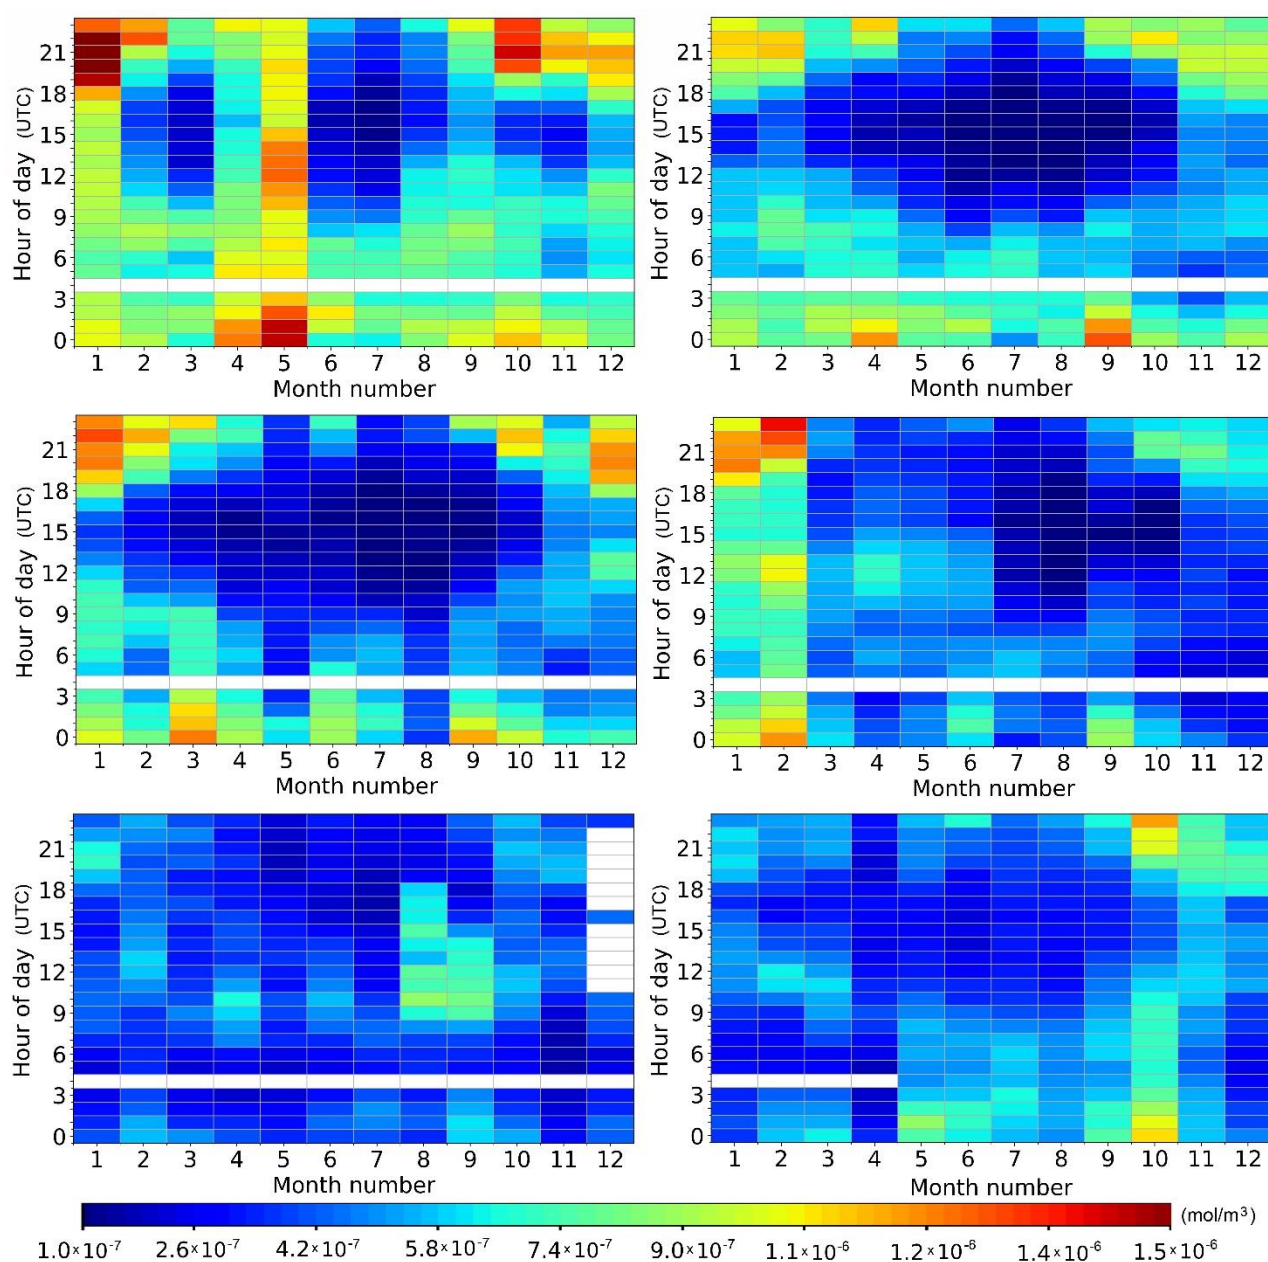

**Figure S8.** Hourly and monthly variation of in-situ  $\text{NO}_2$  for weekends during 2017 (upper left panel), 2018 (upper right panel), 2019 (central left panel), 2020 (central right panel), 2021 (lower left panel), and 2022 (lower right panel).
